# Supplementary material for: Performance evaluation and clinical application of the UA-5600 automatic dry chemistry urine analyzer in renal diseases
Source: PubMed Central journal article supplement — Transl Androl Urol. 2024 Jun 27;13(6):1024–36. doi: 10.21037/tau-24-189 (PMC11228674; doi:10.21037/tau-24-189), 2024-06-27
Supplement: tau-13-06-1024-rc.pdf [file tau-13-06-1024-rc.pdf]

## STARD 2015

| Section & Topic          | Item No | Item                                                                                                                                                  | Reported on Page Number/ Line Number | Reported on Section/ Paragraph                          |
|--------------------------|---------|-------------------------------------------------------------------------------------------------------------------------------------------------------|--------------------------------------|---------------------------------------------------------|
| <b>TITLE OR ABSTRACT</b> |         |                                                                                                                                                       |                                      |                                                         |
|                          | 1       | Identification as a study of diagnostic accuracy using at least one measure of accuracy (such as sensitivity, specificity, predictive values, or AUC) | Page 3/Line 2-7                      | Abstract/ Paragraph 3                                   |
| <b>ABSTRACT</b>          |         |                                                                                                                                                       |                                      |                                                         |
|                          | 2       | Structured summary of study design, methods, results, and conclusions (for specific guidance, see STARD for Abstracts)                                | Page 2/Line17-Page 3/Line11          | Abstract/ Paragraph 1-3                                 |
| <b>INTRODUCTION</b>      |         |                                                                                                                                                       |                                      |                                                         |
|                          | 3       | Scientific and clinical background, including the intended use and clinical role of the index test                                                    | Page 3/Line 17-Page-4/Line 20        | Introduction/ Paragraph 1-5                             |
|                          | 4       | Study objectives and hypotheses                                                                                                                       | Page 3/ Line 16-20                   | Introduction/ Paragraph 4-5                             |
| <b>METHODS</b>           |         |                                                                                                                                                       |                                      |                                                         |
| Study design             | 5       | Whether data collection was planned before the index test and reference standard were performed (prospective study) or after (retrospective study)    | Page 4/ Line 24-26                   | Methods/ Paragraph 1                                    |
| Participants             | 6       | Eligibility criteria                                                                                                                                  | Page 4/ Line 24-30                   | Methods/ Paragraph 1                                    |
|                          | 7       | On what basis potentially eligible participants were identified (such as symptoms, results from previous tests, inclusion in registry)                | Page 6/ Line 21-23                   | Construction of various AI-based ML models/ Paragraph 1 |
|                          | 8       | Where and when potentially eligible participants were identified (setting, location and dates)                                                        | Page 4/ Line 24-30                   | Methods/ Paragraph 1                                    |
|                          | 9       | Whether participants formed a consecutive, random or convenience series                                                                               | Page 4/ Line 24-30                   | Methods/ Paragraph 1                                    |
| Test methods             | 10a     | Index test, in sufficient detail to allow replication                                                                                                 | Page 6/ Line 21-23                   | Construction of various AI-based ML models/ Paragraph 1 |
|                          | 10b     | Reference standard, in sufficient detail to allow replication                                                                                         | Page 6/ Line 21-23                   | Construction of various AI-based ML models/ Paragraph 1 |
|                          | 11      | Rationale for choosing the reference standard (if alternatives exist)                                                                                 | Page 6/ Line 21-23                   | Construction of various AI-based ML models/ Paragraph 1 |
|                          | 12a     | Definition of and rationale for test positivity cut-offs or result categories of the index test, distinguishing pre-specified from exploratory        | Table S1                             | Table S1                                                |

|  |     |                                                                                                                                                        |                    |                                                         |
|--|-----|--------------------------------------------------------------------------------------------------------------------------------------------------------|--------------------|---------------------------------------------------------|
|  | 12b | Definition of and rationale for test positivity cut-offs or result categories of the reference standard, distinguishing pre-specified from exploratory | Table S1           | Table S1                                                |
|  | 13a | Whether clinical information and reference standard results were available to the performers/readers of the index test                                 | Page 6/ Line 21-23 | Construction of various AI-based ML models/ Paragraph 1 |
|  | 13b | Whether clinical information and index test results were available to the assessors of the reference standard                                          | Page 6/ Line 21-23 | Construction of various AI-based ML models/ Paragraph 1 |

|                          |     |                                                                                                             |                     |                                                            |
|--------------------------|-----|-------------------------------------------------------------------------------------------------------------|---------------------|------------------------------------------------------------|
| Analysis                 | 14  | Methods for estimating or comparing measures of diagnostic accuracy                                         | Not applicable.     | Not applicable.                                            |
|                          | 15  | How indeterminate index test or reference standard results were handled                                     | Not applicable.     | Not applicable.                                            |
|                          | 16  | How missing data on the index test and reference standard were handled                                      | Not applicable.     | Not applicable.                                            |
|                          | 17  | Any analyses of variability in diagnostic accuracy, distinguishing pre-specified from exploratory           | Not applicable.     | Not applicable.                                            |
|                          | 18  | Intended sample size and how it was determined                                                              | Page 6/ Line 21-23  | Construction of various AI-based ML models/<br>Paragraph 1 |
| <b>RESULTS</b>           |     |                                                                                                             |                     |                                                            |
| Participants             | 19  | Flow of participants, using a diagram                                                                       | Figure 1            | Figure 1                                                   |
|                          | 20  | Baseline demographic and clinical characteristics of participants                                           | Not applicable.     | Not applicable.                                            |
|                          | 21a | Distribution of severity of disease in those with the target condition                                      | Not applicable.     | Not applicable.                                            |
|                          | 21b | Distribution of alternative diagnoses in those without the target condition                                 | Not applicable.     | Not applicable.                                            |
|                          | 22  | Time interval and any clinical interventions between index test and reference standard                      | Not applicable.     | Not applicable.                                            |
| Test results             | 23  | Cross tabulation of the index test results (or their distribution) by the results of the reference standard | Not applicable.     | Not applicable.                                            |
|                          | 24  | Estimates of diagnostic accuracy and their precision (such as 95% confidence intervals)                     | Not applicable.     | Not applicable.                                            |
|                          | 25  | Any adverse events from performing the index test or the reference standard                                 | Not applicable.     | Not applicable.                                            |
| <b>DISCUSSION</b>        |     |                                                                                                             |                     |                                                            |
|                          | 26  | Study limitations, including sources of potential bias, statistical uncertainty, and generalisability       | Page 14/ Line 5-12  | Discussion/ Paragraph 11                                   |
|                          | 27  | Implications for practice, including the intended use and clinical role of the index test                   | Page 14/ Line 14-19 | Conclusions/ Paragraph 1                                   |
| <b>OTHER INFORMATION</b> |     |                                                                                                             |                     |                                                            |
|                          | 28  | Registration number and name of registry                                                                    | Not applicable.     | Not applicable.                                            |
|                          | 29  | Where the full study protocol can be accessed                                                               | Not applicable.     | Not applicable.                                            |
|                          | 30  | Sources of funding and other support; role of funders                                                       | Page 14/ Line 22-23 | Acknowledgments/<br>Paragraph 1                            |

## AIM

STARD stands for “Standards for Reporting Diagnostic accuracy studies”. This list of items was developed to contribute to the completeness and transparency of reporting of diagnostic accuracy studies. Authors can use the list to write informative study reports. Editors and peer-reviewers can use it to evaluate whether the information has been included in manuscripts submitted for publication.

## Explanation

A **diagnostic accuracy study** evaluates the ability of one or more medical tests to correctly classify study participants as having a **target condition**. This can be a disease, a disease stage, response or benefit from therapy, or an event or condition in the future. A medical test can be an imaging procedure, a laboratory test, elements from history and physical examination, a combination of these, or any other method for collecting information about the current health status of a patient.

The test whose accuracy is evaluated is called **index test**. A study can evaluate the accuracy of one or more index tests. Evaluating the ability of a medical test to correctly classify patients is typically done by comparing the distribution of the index test results with those of the **reference standard**. The reference standard is the best available method for establishing the presence or absence of the target condition. An accuracy study can rely on one or more reference standards.

If test results are categorized as either positive or negative, the cross tabulation of the index test results against those of the reference standard can be used to estimate the **sensitivity** of the index test (the proportion of participants with the target condition who have a positive index test), and its **specificity** (the proportion without the target condition who have a negative index test). From this cross tabulation (sometimes referred to as the contingency or “2x2” table), several other accuracy statistics can be estimated, such as the positive and negative **predictive values** of the test. Confidence intervals around estimates of accuracy can then be calculated to quantify the statistical **precision** of the measurements.

If the index test results can take more than two values, categorization of test results as positive or negative requires a **test positivity cut-off**. When multiple such cut-offs can be defined, authors can report a receiver operating characteristic (ROC) curve which graphically represents the combination of sensitivity and specificity for each possible test positivity cut-off. The **area under the ROC curve** informs in a single numerical value about the overall diagnostic accuracy of the index test.

The **intended use** of a medical test can be diagnosis, screening, staging, monitoring, surveillance, prediction or prognosis. The **clinical role** of a test explains its position relative to existing tests in the clinical pathway. A replacement test, for example, replaces an existing test. A triage test is used before an existing test; an add-on test is used after an existing test.

Besides diagnostic accuracy, several other outcomes and statistics may be relevant in the evaluation of medical tests. Medical tests can also be used to classify patients for purposes other than diagnosis, such as staging or prognosis. The STARD list was not explicitly developed for these other outcomes, statistics, and study types, although most STARD items would still apply.

## DEVELOPMENT

This STARD list was released in 2015. The 30 items were identified by an international expert group of methodologists, researchers, and editors. The guiding principle in the development of STARD was to select items that, when reported, would help readers to judge the potential for bias in the study, to appraise the applicability of the study findings and the validity of conclusions and recommendations. The list represents an update of the first version, which was published in 2003. More information can be found on <http://www.equator-network.org/reporting-guidelines/stard>.

Article information: <https://dx.doi.org/10.21037/tau-24-189>

\*As the checklist was provided upon initial submission, the page number/line number reported may be changed due to copyediting and may not be referable in the published version. In this case, the section/paragraph may be used as an alternative reference.
