# Supplementary material for: Performance evaluation and clinical application of the UA-5600 automatic dry chemistry urine analyzer in renal diseases
Source: PubMed Central journal article supplement — Transl Androl Urol. 2024 Jun 27;13(6):1024–36. doi: 10.21037/tau-24-189 (PMC11228674; doi:10.21037/tau-24-189), 2024-06-27
Supplement: tau-13-06-1024-supplementary.pdf [file tau-13-06-1024-supplementary.pdf]

**Table S1** Relationship between the quantitative and semi-quantitative parameters

| Parameter                          | Semi-quantitative assessment categories |         |         |         |         |      |
|------------------------------------|-----------------------------------------|---------|---------|---------|---------|------|
|                                    | -                                       | ±       | 1+      | 2+      | 3+      | 4+   |
| Red blood cells, cells/ $\mu$ L    | 0–10                                    | 1–20    | 20–50   | 50–140  | >140    | –    |
| Leukocyte esterase, cells/ $\mu$ L | 0–20                                    | 20–40   | 40–100  | 100–300 | >300    | –    |
| Protein, mg/dL                     | 0–10                                    | 10–22.5 | 22.5–75 | 75–200  | >200    | –    |
| Glucose, mg/dL                     | 0–50                                    | 50–75   | 75–175  | 175–375 | 375–750 | >750 |

Note: -,  $\pm$ , 1+, 2+, 3+, 4+, conversion relationships between quantitative and semi-quantitative results for each parameter.

**Table S2** Inter-day precision for the negative controls

| Parameter | Control limits | Inter-day precision        |                         |
|-----------|----------------|----------------------------|-------------------------|
|           |                | General consistency (100%) | Full consistency (100%) |
| LEU       | –              | 80/80 (100%)               | 80/80 (100%)            |
| URO       | Norm           | 80/80 (100%)               | 80/80 (100%)            |
| PRO       | –              | 80/80 (100%)               | 80/80 (100%)            |
| BIL       | –              | 80/80 (100%)               | 80/80 (100%)            |
| GLU       | –              | 80/80 (100%)               | 80/80 (100%)            |
| VC        | –              | 80/80 (100%)               | 80/80 (100%)            |
| SG        | 1.005          | 80/80 (100%)               | 80/80 (100%)            |
| KET       | –              | 80/80 (100%)               | 80/80 (100%)            |
| NIT       | –              | 80/80 (100%)               | 80/80 (100%)            |
| pH        | 5.0            | 80/80 (100%)               | 80/80 (100%)            |
| BLD       | –              | 80/80 (100%)               | 80/80 (100%)            |

LEU, leukocyte; URO, urobilinogen; PRO, protein; BIL, bilirubin; GLU, glucose; VC, vitamin C; SG, specific gravity; KET, ketone bodies; NIT, nitrite; BLD, blood.

**Table S3** Inter-day precision for the positive controls

| Parameter | Control limits | Inter-day precision        |                         |
|-----------|----------------|----------------------------|-------------------------|
|           |                | General consistency (100%) | Full consistency (100%) |
| LEU       | 3+             | 76/80 (95%)                | 80/80 (100%)            |
| URO       | Norm           | 80/80 (100%)               | 80/80 (100%)            |
| PRO       | 2+             | 80/80 (100%)               | 80/80 (100%)            |
| BIL       | 3+             | 77/80 (96.25%)             | 80/80 (100%)            |
| GLU       | 3+             | 80/80 (100%)               | 80/80 (100%)            |
| VC        | 2+             | 50/80 (62.5%)              | 80/80 (100%)            |
| SG        | 1.025          | 76/80 (95%)                | 80/80 (100%)            |
| KET       | 2+             | 55/80 (68.75%)             | 80/80 (100%)            |
| NIT       | +              | 80/80 (100%)               | 80/80 (100%)            |
| pH        | 6.0            | 80/80 (100%)               | 80/80 (100%)            |
| BLD       | 3+             | 80/80 (100%)               | 80/80 (100%)            |

LEU, leukocyte; URO, urobilinogen; PRO, protein; BIL, bilirubin; GLU, glucose; VC, vitamin C; SG, specific gravity; KET, ketone bodies; NIT, nitrite; BLD, blood.

**Table S4** Carry-over contamination rate

| Test items | BLD  |     | LEU  |     | GLU  |     | PRO  |     | URO  |     | BIL  |     | KET  |     | VC   |     | NIT  |     |
|------------|------|-----|------|-----|------|-----|------|-----|------|-----|------|-----|------|-----|------|-----|------|-----|
|            | High | Low |
| Sample 1   | 3+   | -   | 3+   | -   | 4+   | -   | 3+   | -   | 3+   | -   | 3+   | -   | /    | /   | 3+   | -   | /    | /   |
| Sample 2   | 3+   | -   | 3+   | -   | /    | /   | 3+   | -   | 3+   | -   | /    | /   | /    | /   | 3+   | -   | /    | /   |
| Sample 3   | 3+   | -   | 3+   | -   | /    | /   | 3+   | -   | 3+   | -   | /    | /   | /    | /   | 3+   | -   | /    | /   |

LEU, leukocyte; URO, urobilinogen; PRO, protein; BIL, bilirubin; GLU, glucose; VC, vitamin C; KET, ketone bodies; NIT, nitrite; BLD, blood.
